# Supplementary material for: Biostimulants for Sustainable Management of Sport Turfgrass
Source: MDPI journal article supplement (doi:10.3390/plants12030539), 2023-01-24

# MODENA GOLF & COUNTRY CLUB

## FIELD TRIAL in *Agrostis stolonifera* putting green

Suspension of all managements scheduled  
(mechanicals and chemicals)

-30 days after  
treatments

0 days after  
treatments

28 days after  
treatments

56 days after  
treatments

### Treatments tested during the field trials:

CONTROL  
Without  
treatment

EM1  
commercial  
product

ExpA

ExpB

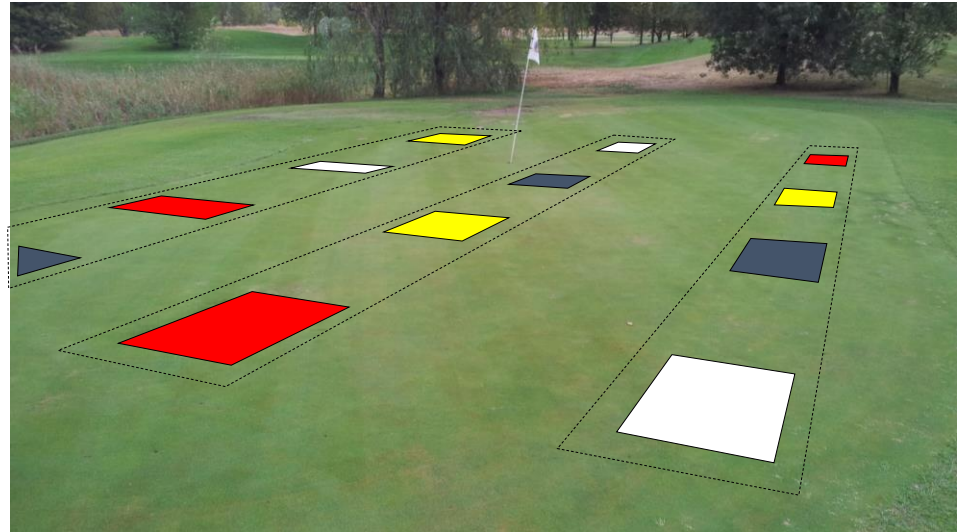

Supplement: s1 [file s1]
