# Supplementary material for: Biostimulants for Sustainable Management of Sport Turfgrass
Source: Plants (Basel). 2023 Jan 24;12(3):539. doi: 10.3390/plants12030539 (PMC9921520; doi:10.3390/plants12030539)
Supplement: Supplementary file 1 [file plants-12-00539-s001.zip]

Archive with 4 entries (4 files):
- Supplementary_ Figure S1.pdf
- Supplementary_ Figure S2.pdf
- Supplementary_ Figure S3.pdf
- Supplementary_ Figure S4.pdf
