# Supplementary figures and images for: Biostimulants for Sustainable Management of Sport Turfgrass
Source: MDPI journal article supplement (doi:10.3390/plants12030539), 2023-01-24

0

7

14

21

28

35

42

49

56

DAT

CONTROL

EM-1

ExpA

ExpB

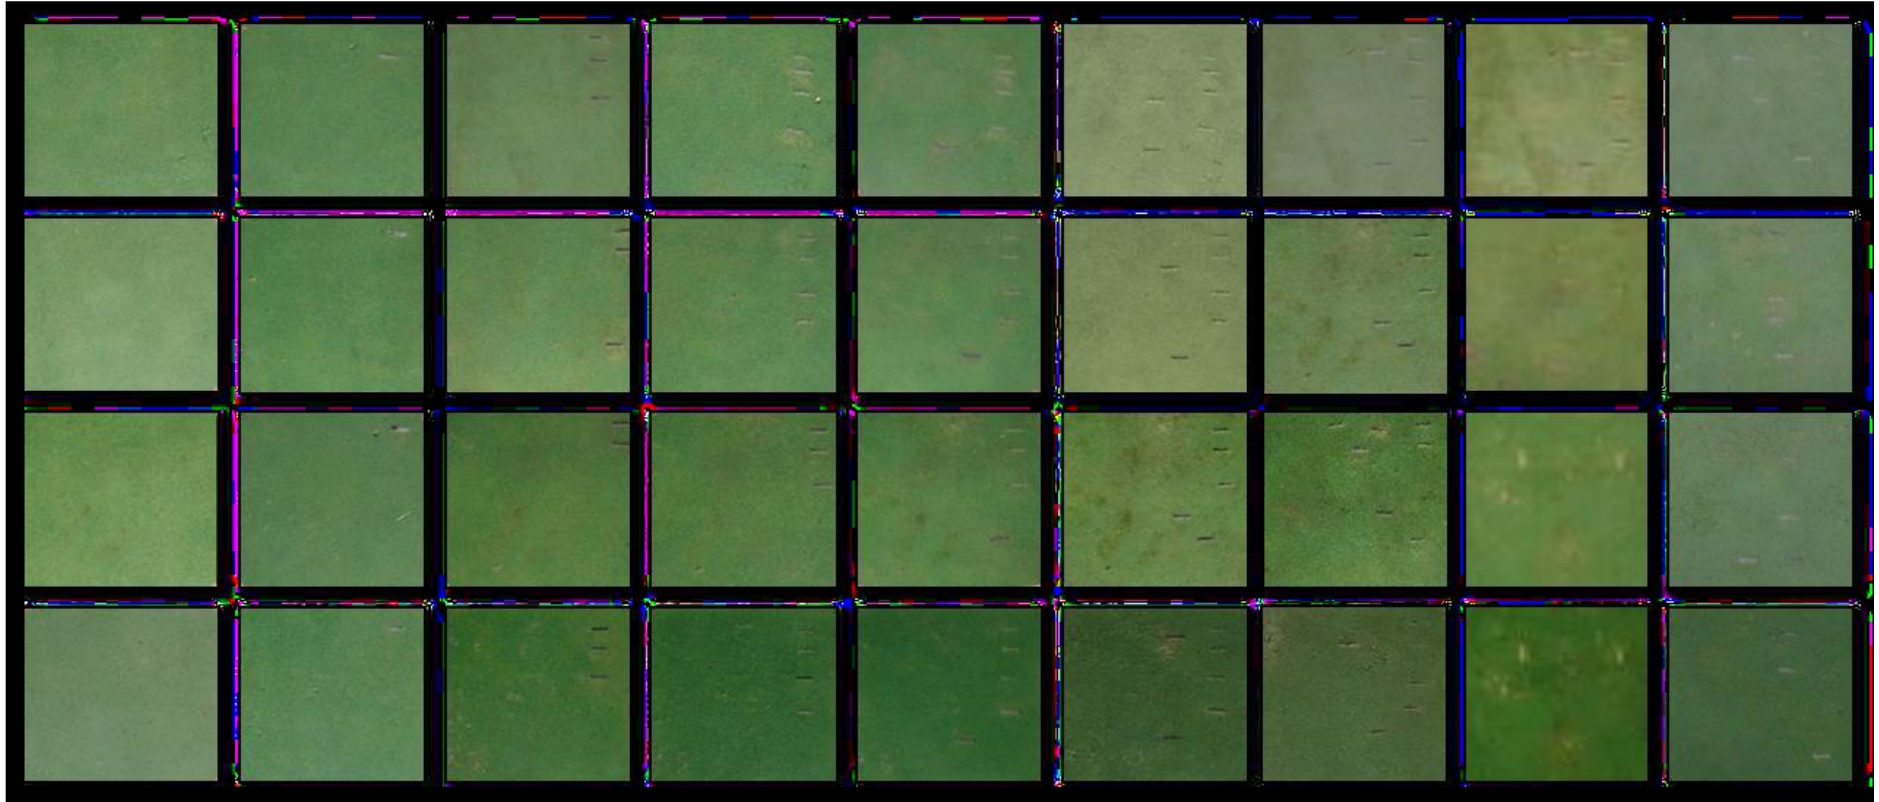

Supplement: s1 [file s1]

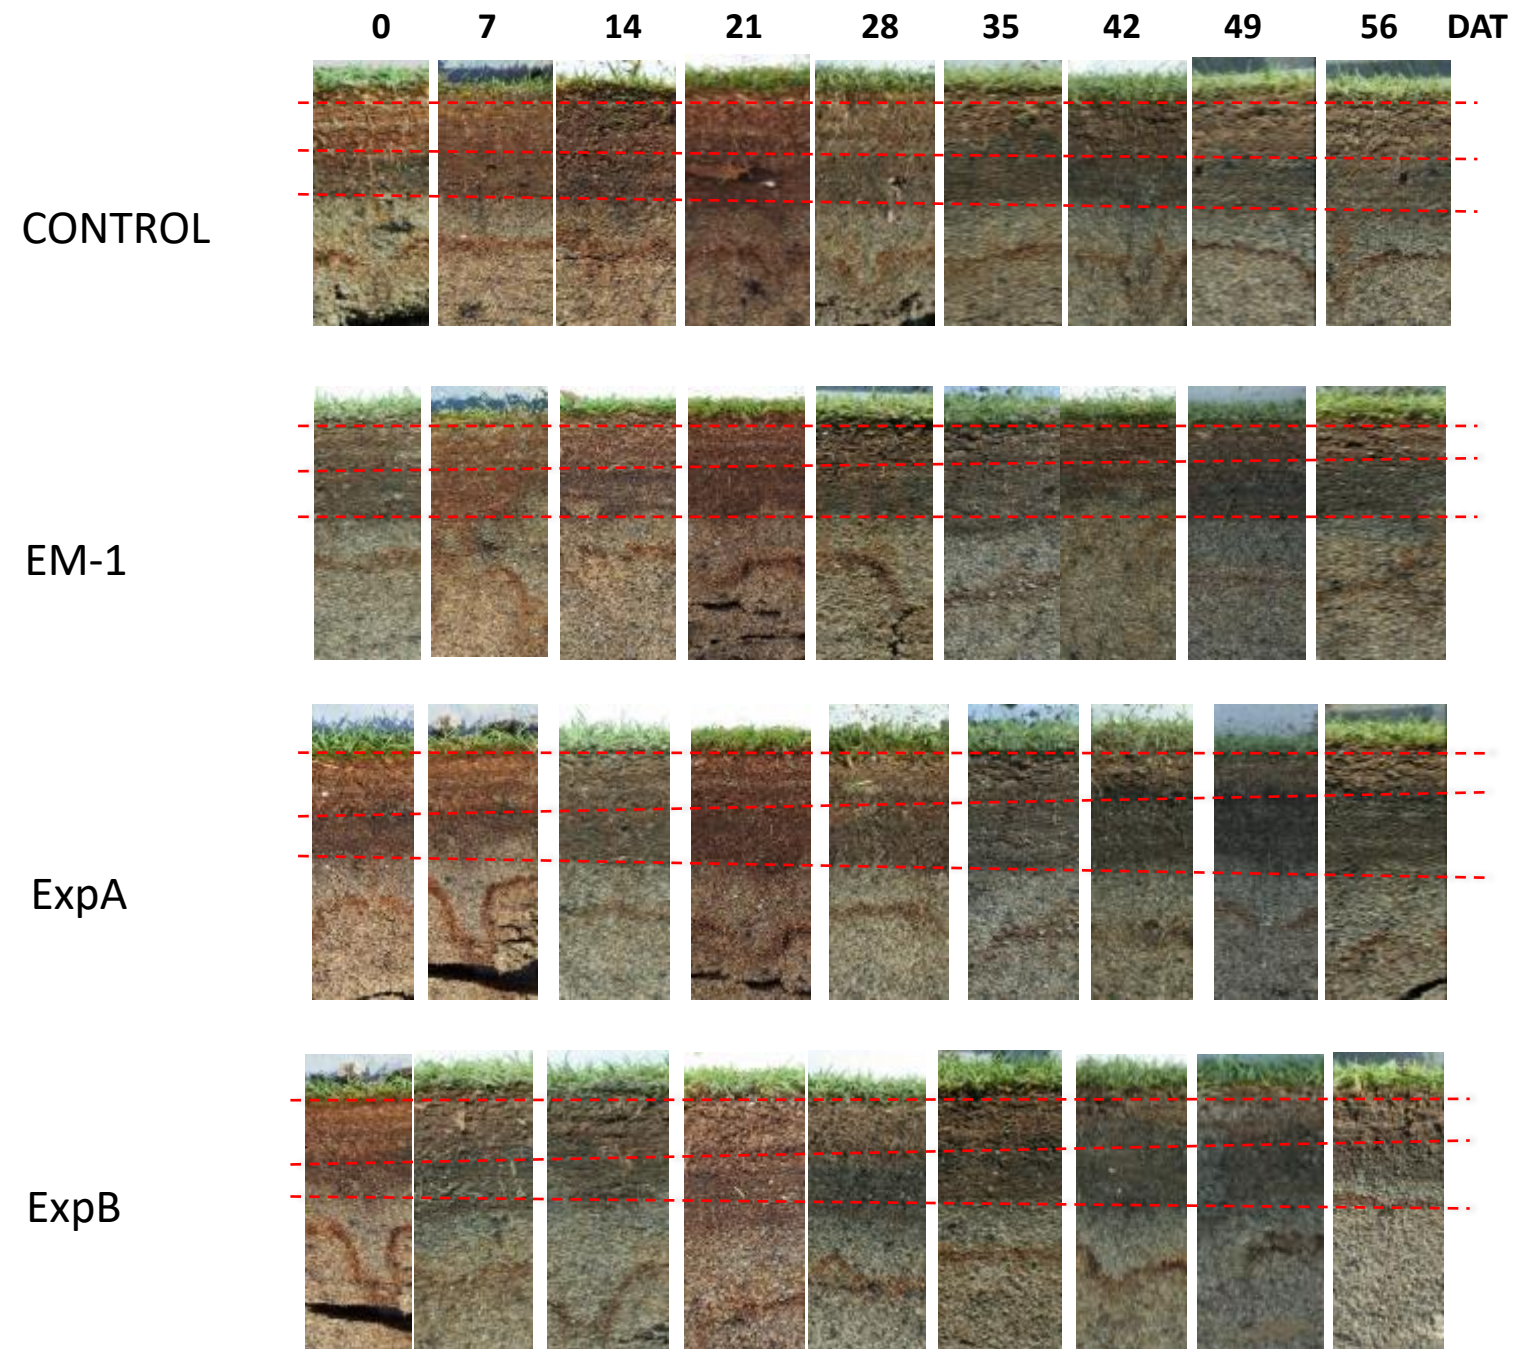

Supplement: s1 [file s1]

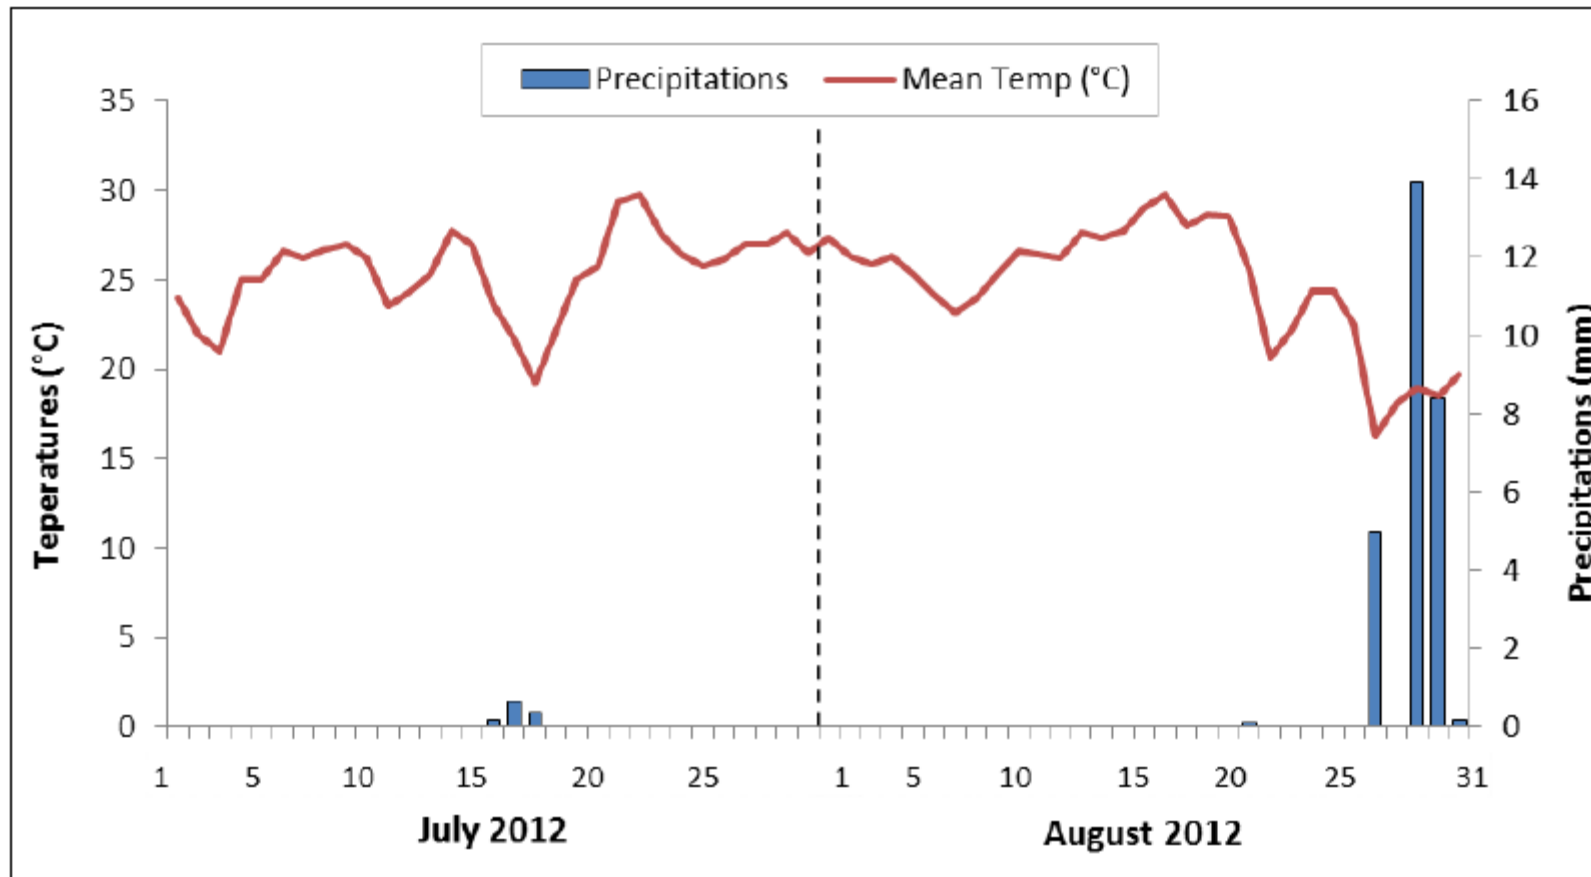

Supplement: s1 [file s1]
